# Supplementary material for: The Effect of Trap Color on Catches of Monochamus galloprovincialis and Three Most Numerous Non-Target Insect Species
Source: MDPI journal article supplement (doi:10.3390/insects13030220), 2022-02-22
Supplement: s1 [file s1]

## INSECTS

### The effect of trap color on catches of *Monochamus galloprovincialis* and three most numerous non-target insect species

*Lidia Sukovata, Aleksander Dziuk, Radosław Plewa and Tomasz Jaworski*

Table S1. The numbers of immature and mature *M. galloprovincialis* beetles that responded to each of the compared pairs of colors in three laboratory tests

| Test | Codes according to<br>RAL or NCS*<br>color systems | Pair of tested colors         | Immature beetles |         | Mature beetles |         |
|------|----------------------------------------------------|-------------------------------|------------------|---------|----------------|---------|
|      |                                                    |                               | males            | females | males          | females |
| 1    | Pairs of contrasting colors                        |                               |                  |         |                |         |
|      | 2003/5010                                          | Pastel Orange / Gentian Blue  | 39/11            | 41/47   | 18/12          | 12/18   |
|      | 2003/3000                                          | Pastel Orange / Flame Red     | 14/6             | 14/6    |                |         |
|      | 6002/5010                                          | Leaf Green / Gentian Blue     | 9/13             | 8/12    |                |         |
|      | 6002/3000                                          | Leaf Green / Flame Red        |                  | 6/14    |                |         |
|      | 8011/3000                                          | Nut Brown / Flame Red         | 13/17            | 14/16   | 14/16          | 15/15   |
| 2    | Pairs of closely related colors                    |                               |                  |         |                |         |
|      | 2003/1034                                          | Pastel Orange / Pastel Yellow | 15/15            | 16/14   | 9/21           | 10/20   |
|      | 3015/3000                                          | Light Pink / Flame Red        | 13/16            | 15/15   | 22/8           | 24/6    |
|      | 4009/4001                                          | Pastel Violet / Red Lilac     | 15/15            | 16/14   | 16/14          | 11/19   |
|      | 5015/5010                                          | Sky Blue / Gentian Blue       | 20/10            | 14/16   | 14/16          | 14/16   |
|      | 6002/S 4030-B90G1*                                 | Leaf Green / Cyan Green       | 15/15            | 17/13   | 13/17          | 10/20   |
|      | 6025/6011                                          | Fern Green / Reseda Green     | 12/18            | 15/15   | 11/19          | 14/16   |
| 3    | Colors tested against white (unpainted) coroplast  |                               |                  |         |                |         |
|      | 1034                                               | Pastel Yellow                 | 8/22             | 12/18   | 9/21           | 12/18   |
|      | 2003                                               | Pastel Orange                 | 9/21             | 6/24    | 7/23           | 4/26    |
|      | 4001                                               | Red Lilac                     |                  | 8/22    | 11/19          | 9/21    |
|      | S 0520-R90B*                                       | Cyan Blue                     | 11/19            | 13/17   | 14/16          | 17/13   |
|      | 5010                                               | Gentian Blue                  |                  | 8/22    | 13/17          | 4/26    |
|      | 5015                                               | Sky Blue                      | 9/21             | 10/20   | 10/20          | 10/20   |
|      | 6002                                               | Leaf Green                    | 5/25             | 10/20   | 13/17          | 7/23    |
|      | 6011                                               | Reseda Green                  | 14/15            | 11/19   | 9/21           | 8/22    |
|      | 6025                                               | Fern Green                    |                  | 8/22    | 8/22           | 2/28    |

\* NCS—Natural Color System®
